# Supplementary material
Source: publisher figshare collection journal article supplement (https://acs.figshare.com/ndownloader/files/4276070)
Supplement: Supplementary file 1 [file 4276070]

 
data_p-1 
 
_audit_creation_method            SHELXL-97 
_chemical_name_systematic 
; 
 ? 
; 
_chemical_name_common             ? 
_chemical_melting_point           ? 
_chemical_formula_moiety          ? 
_chemical_formula_sum 
 'C23 H15 N7 O13' 
_chemical_formula_weight          597.42 
 
loop_ 
 _atom_type_symbol 
 _atom_type_description 
 _atom_type_scat_dispersion_real 
 _atom_type_scat_dispersion_imag 
 _atom_type_scat_source 
 'C'  'C'   0.0033   0.0016 
 'International Tables Vol C Tables 4.2.6.8 and 6.1.1.4' 
 'H'  'H'   0.0000   0.0000 
 'International Tables Vol C Tables 4.2.6.8 and 6.1.1.4' 
 'N'  'N'   0.0061   0.0033 
 'International Tables Vol C Tables 4.2.6.8 and 6.1.1.4' 
 'O'  'O'   0.0106   0.0060 
 'International Tables Vol C Tables 4.2.6.8 and 6.1.1.4' 
 
_symmetry_cell_setting            triclinic
_symmetry_space_group_name_H-M    P-1
 
loop_ 
 _symmetry_equiv_pos_as_xyz 
 'x, y, z' 
 '-x, -y, -z' 
 
_cell_length_a                    9.7248(3) 
_cell_length_b                    10.2761(3) 
_cell_length_c                    13.0872(3) 
_cell_angle_alpha                 92.220(2) 
_cell_angle_beta                  109.872(3) 
_cell_angle_gamma                 97.000(3) 
_cell_volume                      1216.29(6) 
_cell_formula_units_Z             2 
_cell_measurement_temperature     110(2) 
_cell_measurement_reflns_used     15845
_cell_measurement_theta_min       2.9130
_cell_measurement_theta_max       27.4976
 
_exptl_crystal_description        prism
_exptl_crystal_colour             yellow 
_exptl_crystal_size_max           0.32 
_exptl_crystal_size_mid           0.17 
_exptl_crystal_size_min           0.07 
_exptl_crystal_density_meas       ? 
_exptl_crystal_density_diffrn     1.631 
_exptl_crystal_density_method     'not measured' 
_exptl_crystal_F_000              612 
_exptl_absorpt_coefficient_mu     0.137 
_exptl_absorpt_correction_type    none 
_exptl_absorpt_correction_T_min   ? 
_exptl_absorpt_correction_T_max   ? 
_exptl_absorpt_process_details    ? 
 
_exptl_special_details 
; 
 ? 
; 
 
_diffrn_ambient_temperature       110(2) 
_diffrn_radiation_wavelength      0.71073 
_diffrn_radiation_type            MoK\a 
_diffrn_radiation_source          'Enhance (Mo) X-ray Source'
_diffrn_radiation_monochromator   graphite 
_diffrn_measurement_device_type   'Xcalibur, Sapphire2, large Be window' 
_diffrn_measurement_method        '\w scans, 1453 frames, 15 sec per frame'
_diffrn_detector_area_resol_mean  8.4171
_diffrn_standards_number          ? 
_diffrn_standards_interval_count  ? 
_diffrn_standards_interval_time   ? 
_diffrn_standards_decay_%         ? 
_diffrn_reflns_number             29500 
_diffrn_reflns_av_R_equivalents   0.0295 
_diffrn_reflns_av_sigmaI/netI     0.0167 
_diffrn_reflns_limit_h_min        -12 
_diffrn_reflns_limit_h_max        12 
_diffrn_reflns_limit_k_min        -12 
_diffrn_reflns_limit_k_max        12 
_diffrn_reflns_limit_l_min        -16 
_diffrn_reflns_limit_l_max        16 
_diffrn_reflns_theta_min          3.16 
_diffrn_reflns_theta_max          26.25 
_reflns_number_total              4902 
_reflns_number_gt                 4334 
_reflns_threshold_expression      >2sigma(I) 
 
_computing_data_collection        'CrysAlisPro'
_computing_cell_refinement        'CrysAlisPro'
_computing_data_reduction         'CrysAlisPro' 
_computing_structure_solution     'SHELXS-97 (Sheldrick, 1990)' 
_computing_structure_refinement   'SHELXL-97 (Sheldrick, 1997)' 
_computing_molecular_graphics     'SHELXL-97'
_computing_publication_material   'SHELXL-97'
 
_refine_special_details 
; 
 Refinement of F^2^ against ALL reflections.  The weighted R-factor wR and 
 goodness of fit S are based on F^2^, conventional R-factors R are based 
 on F, with F set to zero for negative F^2^. The threshold expression of 
 F^2^ > 2sigma(F^2^) is used only for calculating R-factors(gt) etc. and is 
 not relevant to the choice of reflections for refinement.  R-factors based 
 on F^2^ are statistically about twice as large as those based on F, and R- 
 factors based on ALL data will be even larger. 
; 
 
_refine_ls_structure_factor_coef  Fsqd  
_refine_ls_matrix_type            full 
_refine_ls_weighting_scheme       calc  
_refine_ls_weighting_details 
 'calc w=1/[\s^2^(Fo^2^)+(0.0533P)^2^+0.8646P] where P=(Fo^2^+2Fc^2^)/3' 
_atom_sites_solution_primary      direct 
_atom_sites_solution_secondary    difmap 
_atom_sites_solution_hydrogens    geom 
_refine_ls_hydrogen_treatment     constr
_refine_ls_extinction_method      none 
_refine_ls_extinction_coef        ? 
_refine_ls_number_reflns          4902 
_refine_ls_number_parameters      390 
_refine_ls_number_restraints      0 
_refine_ls_R_factor_all           0.0452 
_refine_ls_R_factor_gt            0.0395 
_refine_ls_wR_factor_ref          0.1069 
_refine_ls_wR_factor_gt           0.1037 
_refine_ls_goodness_of_fit_ref    1.049 
_refine_ls_restrained_S_all       1.049 
_refine_ls_shift/su_max           0.001 
_refine_ls_shift/su_mean          0.000 
 
loop_ 
 _atom_site_label 
 _atom_site_type_symbol 
 _atom_site_fract_x 
 _atom_site_fract_y 
 _atom_site_fract_z 
 _atom_site_U_iso_or_equiv 
 _atom_site_adp_type 
 _atom_site_occupancy 
 _atom_site_symmetry_multiplicity 
 _atom_site_calc_flag 
 _atom_site_refinement_flags 
 _atom_site_disorder_assembly 
 _atom_site_disorder_group 
C1 C 0.17310(17) 0.55490(15) 0.41101(13) 0.0161(3) Uani 1 1 d . . . 
H1 H 0.0997 0.4794 0.3887 0.019 Uiso 1 1 calc R . . 
C2 C 0.29844(18) 0.55858(15) 0.50279(13) 0.0172(3) Uani 1 1 d . . . 
C3 C 0.40961(17) 0.66647(15) 0.53334(13) 0.0168(3) Uani 1 1 d . . . 
C4 C 0.39685(16) 0.77463(15) 0.47234(12) 0.0153(3) Uani 1 1 d . . . 
H4 H 0.4740 0.8471 0.4912 0.018 Uiso 1 1 calc R . . 
C4A C 0.26965(16) 0.77453(14) 0.38366(12) 0.0138(3) Uani 1 1 d . . . 
C5 C 0.22666(17) 0.90598(15) 0.12009(13) 0.0165(3) Uani 1 1 d . . . 
H5 H 0.3007 0.9811 0.1408 0.020 Uiso 1 1 calc R . . 
C6 C 0.16144(17) 0.85669(15) 0.01217(13) 0.0175(3) Uani 1 1 d . . . 
C7 C 0.05572(17) 0.74493(15) -0.01879(13) 0.0171(3) Uani 1 1 d . . . 
C8 C 0.01011(17) 0.68154(15) 0.05888(13) 0.0157(3) Uani 1 1 d . . . 
H8 H -0.0618 0.6049 0.0384 0.019 Uiso 1 1 calc R . . 
C8A C 0.07189(16) 0.73273(14) 0.16627(12) 0.0141(3) Uani 1 1 d . . . 
C9 C 0.02159(16) 0.68661(14) 0.25899(12) 0.0136(3) Uani 1 1 d . . . 
H9 H -0.0575 0.6085 0.2367 0.016 Uiso 1 1 calc R . . 
C9A C 0.15881(16) 0.66546(14) 0.35297(12) 0.0137(3) Uani 1 1 d . . . 
C10 C 0.22855(16) 0.89165(14) 0.31701(12) 0.0139(3) Uani 1 1 d . . . 
H10 H 0.3079 0.9696 0.3392 0.017 Uiso 1 1 calc R . . 
C10A C 0.18138(16) 0.84312(14) 0.19718(12) 0.0144(3) Uani 1 1 d . . . 
C11 C 0.08356(16) 0.91952(15) 0.32941(12) 0.0138(3) Uani 1 1 d . . . 
C12 C 0.05508(16) 1.04036(15) 0.36123(12) 0.0143(3) Uani 1 1 d . . . 
H12 H 0.1295 1.1151 0.3815 0.017 Uiso 1 1 calc R . . 
C13 C -0.08577(17) 1.04887(15) 0.36258(12) 0.0153(3) Uani 1 1 d . . . 
C14 C -0.19349(16) 0.93874(15) 0.33467(12) 0.0154(3) Uani 1 1 d . . . 
C15 C -0.16554(16) 0.81849(15) 0.30156(12) 0.0148(3) Uani 1 1 d . . . 
H15 H -0.2400 0.7438 0.2815 0.018 Uiso 1 1 calc R . . 
C16 C -0.02654(16) 0.80971(14) 0.29837(12) 0.0136(3) Uani 1 1 d . . . 
N2 N 0.30054(15) 0.44815(13) 0.57140(11) 0.0201(3) Uani 1 1 d . . . 
O21 O 0.28159(17) 0.47092(13) 0.65789(11) 0.0337(3) Uani 1 1 d . . . 
O22 O 0.31621(13) 0.34124(11) 0.53696(11) 0.0253(3) Uani 1 1 d . . . 
N3 N 0.54052(16) 0.67090(14) 0.63173(12) 0.0229(3) Uani 1 1 d . . . 
O31 O 0.61237(15) 0.77889(13) 0.67081(11) 0.0344(3) Uani 1 1 d . . . 
O32 O 0.57200(15) 0.56632(13) 0.66870(11) 0.0342(3) Uani 1 1 d . . . 
N6 N 0.20574(15) 0.93718(13) -0.06581(11) 0.0203(3) Uani 1 1 d . . . 
O61 O 0.31211(15) 0.91373(14) -0.08840(12) 0.0333(3) Uani 1 1 d . . . 
O62 O 0.13616(15) 1.02768(13) -0.09734(11) 0.0303(3) Uani 1 1 d . . . 
N7 N -0.01310(15) 0.69148(14) -0.13322(11) 0.0201(3) Uani 1 1 d . . . 
O71 O -0.10129(13) 0.59073(12) -0.15397(10) 0.0260(3) Uani 1 1 d . . . 
O72 O 0.02282(16) 0.75133(13) -0.20181(10) 0.0330(3) Uani 1 1 d . . . 
N13 N -0.12101(15) 1.17978(13) 0.38454(11) 0.0179(3) Uani 1 1 d . . . 
O131 O -0.24685(13) 1.20164(12) 0.33572(10) 0.0248(3) Uani 1 1 d . . . 
O132 O -0.02129(14) 1.25935(11) 0.44827(10) 0.0257(3) Uani 1 1 d . . . 
N14 N -0.33775(14) 0.94133(13) 0.34712(11) 0.0183(3) Uani 1 1 d . . . 
O142 O -0.44776(13) 0.89376(14) 0.27122(11) 0.0317(3) Uani 1 1 d . . . 
O141 O -0.33782(13) 0.98610(11) 0.43522(10) 0.0221(3) Uani 1 1 d . . . 
O1L O 0.77817(13) 0.46539(12) 1.10068(10) 0.0277(3) Uani 1 1 d . . . 
N1L N 0.55928(16) 0.35217(14) 0.98993(12) 0.0232(3) Uani 1 1 d . . . 
C1L C 0.66332(18) 0.39114(16) 1.08678(14) 0.0218(3) Uani 1 1 d . . . 
H1L H 0.6473 0.3591 1.1495 0.026 Uiso 1 1 calc R . . 
C2L C 0.5776(2) 0.39469(18) 0.89005(15) 0.0279(4) Uani 1 1 d . . . 
H2L1 H 0.6605 0.4664 0.9081 0.042 Uiso 1 1 calc R . . 
H2L2 H 0.4870 0.4257 0.8443 0.042 Uiso 1 1 calc R . . 
H2L3 H 0.5977 0.3207 0.8504 0.042 Uiso 1 1 calc R . . 
C3L C 0.4273(2) 0.26230(19) 0.98010(17) 0.0317(4) Uani 1 1 d . . . 
H3L1 H 0.4294 0.2405 1.0528 0.048 Uiso 1 1 calc R . . 
H3L2 H 0.4236 0.1817 0.9362 0.048 Uiso 1 1 calc R . . 
H3L3 H 0.3397 0.3040 0.9447 0.048 Uiso 1 1 calc R . . 
 
loop_ 
 _atom_site_aniso_label 
 _atom_site_aniso_U_11 
 _atom_site_aniso_U_22 
 _atom_site_aniso_U_33 
 _atom_site_aniso_U_23 
 _atom_site_aniso_U_13 
 _atom_site_aniso_U_12 
C1 0.0177(7) 0.0131(7) 0.0192(8) 0.0009(6) 0.0089(6) 0.0014(6) 
C2 0.0212(8) 0.0149(7) 0.0193(8) 0.0049(6) 0.0105(6) 0.0053(6) 
C3 0.0156(7) 0.0195(8) 0.0165(7) 0.0019(6) 0.0063(6) 0.0049(6) 
C4 0.0138(7) 0.0155(7) 0.0185(7) 0.0002(6) 0.0084(6) 0.0015(6) 
C4A 0.0157(7) 0.0122(7) 0.0167(7) 0.0017(6) 0.0093(6) 0.0033(6) 
C5 0.0140(7) 0.0143(7) 0.0230(8) 0.0057(6) 0.0080(6) 0.0035(6) 
C6 0.0181(7) 0.0178(7) 0.0212(8) 0.0086(6) 0.0106(6) 0.0073(6) 
C7 0.0183(7) 0.0184(7) 0.0163(8) 0.0029(6) 0.0064(6) 0.0071(6) 
C8 0.0154(7) 0.0134(7) 0.0194(8) 0.0028(6) 0.0068(6) 0.0038(6) 
C8A 0.0147(7) 0.0127(7) 0.0175(7) 0.0046(6) 0.0075(6) 0.0051(6) 
C9 0.0133(7) 0.0122(7) 0.0153(7) 0.0019(5) 0.0054(6) 0.0007(5) 
C9A 0.0142(7) 0.0143(7) 0.0149(7) 0.0008(5) 0.0078(6) 0.0027(6) 
C10 0.0128(7) 0.0115(7) 0.0183(7) 0.0023(6) 0.0066(6) 0.0011(5) 
C10A 0.0129(7) 0.0131(7) 0.0184(7) 0.0032(6) 0.0058(6) 0.0052(6) 
C11 0.0130(7) 0.0157(7) 0.0128(7) 0.0037(5) 0.0048(6) 0.0016(6) 
C12 0.0152(7) 0.0139(7) 0.0132(7) 0.0025(5) 0.0044(6) 0.0013(5) 
C13 0.0185(7) 0.0155(7) 0.0123(7) 0.0013(6) 0.0053(6) 0.0043(6) 
C14 0.0132(7) 0.0211(8) 0.0131(7) 0.0027(6) 0.0055(6) 0.0037(6) 
C15 0.0130(7) 0.0167(7) 0.0131(7) 0.0028(6) 0.0033(6) -0.0005(6) 
C16 0.0160(7) 0.0133(7) 0.0116(7) 0.0036(5) 0.0048(6) 0.0020(6) 
N2 0.0195(7) 0.0178(7) 0.0224(7) 0.0054(5) 0.0061(6) 0.0024(5) 
O21 0.0568(9) 0.0241(7) 0.0249(7) 0.0069(5) 0.0203(6) 0.0047(6) 
O22 0.0264(6) 0.0178(6) 0.0354(7) 0.0067(5) 0.0137(5) 0.0065(5) 
N3 0.0208(7) 0.0221(7) 0.0230(7) 0.0055(6) 0.0039(6) 0.0023(6) 
O31 0.0309(7) 0.0264(7) 0.0323(7) 0.0021(5) -0.0038(6) -0.0036(5) 
O32 0.0300(7) 0.0285(7) 0.0358(7) 0.0142(6) -0.0009(6) 0.0049(6) 
N6 0.0228(7) 0.0198(7) 0.0190(7) 0.0038(5) 0.0082(6) 0.0016(6) 
O61 0.0364(7) 0.0366(7) 0.0391(8) 0.0127(6) 0.0259(6) 0.0102(6) 
O62 0.0361(7) 0.0271(7) 0.0319(7) 0.0152(5) 0.0133(6) 0.0118(6) 
N7 0.0226(7) 0.0210(7) 0.0166(7) 0.0037(5) 0.0061(5) 0.0040(6) 
O71 0.0263(6) 0.0282(7) 0.0199(6) -0.0007(5) 0.0059(5) -0.0018(5) 
O72 0.0479(8) 0.0323(7) 0.0186(6) 0.0074(5) 0.0130(6) -0.0015(6) 
N13 0.0216(7) 0.0174(6) 0.0183(7) 0.0028(5) 0.0106(5) 0.0049(5) 
O131 0.0226(6) 0.0233(6) 0.0337(7) 0.0079(5) 0.0138(5) 0.0103(5) 
O132 0.0305(7) 0.0194(6) 0.0259(6) -0.0049(5) 0.0098(5) 0.0007(5) 
N14 0.0156(7) 0.0195(7) 0.0200(7) 0.0007(5) 0.0066(5) 0.0023(5) 
O142 0.0136(6) 0.0467(8) 0.0290(7) -0.0105(6) 0.0021(5) 0.0020(5) 
O141 0.0229(6) 0.0240(6) 0.0229(6) -0.0019(5) 0.0136(5) 0.0013(5) 
O1L 0.0217(6) 0.0271(6) 0.0300(7) -0.0020(5) 0.0063(5) -0.0043(5) 
N1L 0.0202(7) 0.0194(7) 0.0276(8) 0.0014(6) 0.0059(6) 0.0009(5) 
C1L 0.0211(8) 0.0177(8) 0.0257(9) 0.0004(6) 0.0072(7) 0.0031(6) 
C2L 0.0286(9) 0.0277(9) 0.0248(9) 0.0007(7) 0.0056(7) 0.0058(7) 
C3L 0.0208(9) 0.0275(9) 0.0408(11) 0.0011(8) 0.0055(8) -0.0037(7) 
 
_geom_special_details 
; 
 All esds (except the esd in the dihedral angle between two l.s. planes) 
 are estimated using the full covariance matrix.  The cell esds are taken 
 into account individually in the estimation of esds in distances, angles 
 and torsion angles; correlations between esds in cell parameters are only 
 used when they are defined by crystal symmetry.  An approximate (isotropic) 
 treatment of cell esds is used for estimating esds involving l.s. planes. 
; 
 
loop_ 
 _geom_bond_atom_site_label_1 
 _geom_bond_atom_site_label_2 
 _geom_bond_distance 
 _geom_bond_site_symmetry_2 
 _geom_bond_publ_flag 
C1 C2 1.386(2) . ? 
C1 C9A 1.386(2) . ? 
C1 H1 0.9500 . ? 
C2 C3 1.392(2) . ? 
C2 N2 1.472(2) . ? 
C3 C4 1.387(2) . ? 
C3 N3 1.466(2) . ? 
C4 C4A 1.379(2) . ? 
C4 H4 0.9500 . ? 
C4A C9A 1.398(2) . ? 
C4A C10 1.527(2) . ? 
C5 C6 1.382(2) . ? 
C5 C10A 1.383(2) . ? 
C5 H5 0.9500 . ? 
C6 C7 1.390(2) . ? 
C6 N6 1.479(2) . ? 
C7 C8 1.393(2) . ? 
C7 N7 1.469(2) . ? 
C8 C8A 1.380(2) . ? 
C8 H8 0.9500 . ? 
C8A C10A 1.401(2) . ? 
C8A C9 1.526(2) . ? 
C9 C9A 1.522(2) . ? 
C9 C16 1.531(2) . ? 
C9 H9 1.0000 . ? 
C10 C10A 1.521(2) . ? 
C10 C11 1.532(2) . ? 
C10 H10 1.0000 . ? 
C11 C12 1.384(2) . ? 
C11 C16 1.400(2) . ? 
C12 C13 1.389(2) . ? 
C12 H12 0.9500 . ? 
C13 C14 1.389(2) . ? 
C13 N13 1.469(2) . ? 
C14 C15 1.382(2) . ? 
C14 N14 1.4695(19) . ? 
C15 C16 1.380(2) . ? 
C15 H15 0.9500 . ? 
N2 O22 1.2176(18) . ? 
N2 O21 1.2254(19) . ? 
N3 O32 1.2258(19) . ? 
N3 O31 1.2269(19) . ? 
N6 O61 1.2161(19) . ? 
N6 O62 1.2191(18) . ? 
N7 O71 1.2185(18) . ? 
N7 O72 1.2287(19) . ? 
N13 O131 1.2259(18) . ? 
N13 O132 1.2283(18) . ? 
N14 O142 1.2177(18) . ? 
N14 O141 1.2249(18) . ? 
O1L C1L 1.227(2) . ? 
N1L C1L 1.335(2) . ? 
N1L C3L 1.451(2) . ? 
N1L C2L 1.454(2) . ? 
C1L H1L 0.9500 . ? 
C2L H2L1 0.9800 . ? 
C2L H2L2 0.9800 . ? 
C2L H2L3 0.9800 . ? 
C3L H3L1 0.9800 . ? 
C3L H3L2 0.9800 . ? 
C3L H3L3 0.9800 . ? 
 
loop_ 
 _geom_angle_atom_site_label_1 
 _geom_angle_atom_site_label_2 
 _geom_angle_atom_site_label_3 
 _geom_angle 
 _geom_angle_site_symmetry_1 
 _geom_angle_site_symmetry_3 
 _geom_angle_publ_flag 
C2 C1 C9A 117.52(14) . . ? 
C2 C1 H1 121.2 . . ? 
C9A C1 H1 121.2 . . ? 
C1 C2 C3 121.62(14) . . ? 
C1 C2 N2 116.19(14) . . ? 
C3 C2 N2 121.94(14) . . ? 
C4 C3 C2 120.39(14) . . ? 
C4 C3 N3 118.23(14) . . ? 
C2 C3 N3 121.36(14) . . ? 
C4A C4 C3 118.48(14) . . ? 
C4A C4 H4 120.8 . . ? 
C3 C4 H4 120.8 . . ? 
C4 C4A C9A 120.79(14) . . ? 
C4 C4A C10 125.30(13) . . ? 
C9A C4A C10 113.69(13) . . ? 
C6 C5 C10A 118.25(14) . . ? 
C6 C5 H5 120.9 . . ? 
C10A C5 H5 120.9 . . ? 
C5 C6 C7 121.43(14) . . ? 
C5 C6 N6 114.61(14) . . ? 
C7 C6 N6 123.82(14) . . ? 
C6 C7 C8 120.30(14) . . ? 
C6 C7 N7 121.68(14) . . ? 
C8 C7 N7 118.01(14) . . ? 
C8A C8 C7 118.41(14) . . ? 
C8A C8 H8 120.8 . . ? 
C7 C8 H8 120.8 . . ? 
C8 C8A C10A 120.89(14) . . ? 
C8 C8A C9 125.25(13) . . ? 
C10A C8A C9 113.63(13) . . ? 
C9A C9 C8A 107.38(12) . . ? 
C9A C9 C16 104.36(12) . . ? 
C8A C9 C16 103.16(11) . . ? 
C9A C9 H9 113.7 . . ? 
C8A C9 H9 113.7 . . ? 
C16 C9 H9 113.7 . . ? 
C1 C9A C4A 121.09(14) . . ? 
C1 C9A C9 125.10(13) . . ? 
C4A C9A C9 113.60(13) . . ? 
C10A C10 C4A 107.58(12) . . ? 
C10A C10 C11 103.05(12) . . ? 
C4A C10 C11 104.70(12) . . ? 
C10A C10 H10 113.5 . . ? 
C4A C10 H10 113.5 . . ? 
C11 C10 H10 113.5 . . ? 
C5 C10A C8A 120.66(14) . . ? 
C5 C10A C10 125.39(14) . . ? 
C8A C10A C10 113.61(13) . . ? 
C12 C11 C16 121.05(14) . . ? 
C12 C11 C10 125.78(13) . . ? 
C16 C11 C10 113.06(13) . . ? 
C11 C12 C13 117.88(14) . . ? 
C11 C12 H12 121.1 . . ? 
C13 C12 H12 121.1 . . ? 
C12 C13 C14 120.86(14) . . ? 
C12 C13 N13 117.88(13) . . ? 
C14 C13 N13 121.03(14) . . ? 
C15 C14 C13 121.20(14) . . ? 
C15 C14 N14 116.64(13) . . ? 
C13 C14 N14 121.98(14) . . ? 
C16 C15 C14 118.27(14) . . ? 
C16 C15 H15 120.9 . . ? 
C14 C15 H15 120.9 . . ? 
C15 C16 C11 120.70(14) . . ? 
C15 C16 C9 125.32(13) . . ? 
C11 C16 C9 113.95(13) . . ? 
O22 N2 O21 125.15(14) . . ? 
O22 N2 C2 118.09(13) . . ? 
O21 N2 C2 116.72(13) . . ? 
O32 N3 O31 124.36(14) . . ? 
O32 N3 C3 117.81(14) . . ? 
O31 N3 C3 117.82(13) . . ? 
O61 N6 O62 125.23(14) . . ? 
O61 N6 C6 118.50(13) . . ? 
O62 N6 C6 116.12(13) . . ? 
O71 N7 O72 124.28(14) . . ? 
O71 N7 C7 118.11(13) . . ? 
O72 N7 C7 117.61(14) . . ? 
O131 N13 O132 125.29(14) . . ? 
O131 N13 C13 117.22(13) . . ? 
O132 N13 C13 117.46(13) . . ? 
O142 N14 O141 124.78(14) . . ? 
O142 N14 C14 117.84(13) . . ? 
O141 N14 C14 117.29(13) . . ? 
C1L N1L C3L 121.44(16) . . ? 
C1L N1L C2L 120.76(15) . . ? 
C3L N1L C2L 117.76(15) . . ? 
O1L C1L N1L 124.75(17) . . ? 
O1L C1L H1L 117.6 . . ? 
N1L C1L H1L 117.6 . . ? 
N1L C2L H2L1 109.5 . . ? 
N1L C2L H2L2 109.5 . . ? 
H2L1 C2L H2L2 109.5 . . ? 
N1L C2L H2L3 109.5 . . ? 
H2L1 C2L H2L3 109.5 . . ? 
H2L2 C2L H2L3 109.5 . . ? 
N1L C3L H3L1 109.5 . . ? 
N1L C3L H3L2 109.5 . . ? 
H3L1 C3L H3L2 109.5 . . ? 
N1L C3L H3L3 109.5 . . ? 
H3L1 C3L H3L3 109.5 . . ? 
H3L2 C3L H3L3 109.5 . . ? 
 
loop_ 
 _geom_torsion_atom_site_label_1 
 _geom_torsion_atom_site_label_2 
 _geom_torsion_atom_site_label_3 
 _geom_torsion_atom_site_label_4 
 _geom_torsion 
 _geom_torsion_site_symmetry_1 
 _geom_torsion_site_symmetry_2 
 _geom_torsion_site_symmetry_3 
 _geom_torsion_site_symmetry_4 
 _geom_torsion_publ_flag 
C9A C1 C2 C3 -2.9(2) . . . . ? 
C9A C1 C2 N2 171.48(13) . . . . ? 
C1 C2 C3 C4 0.5(2) . . . . ? 
N2 C2 C3 C4 -173.53(14) . . . . ? 
C1 C2 C3 N3 178.75(14) . . . . ? 
N2 C2 C3 N3 4.7(2) . . . . ? 
C2 C3 C4 C4A 2.4(2) . . . . ? 
N3 C3 C4 C4A -175.93(13) . . . . ? 
C3 C4 C4A C9A -2.8(2) . . . . ? 
C3 C4 C4A C10 171.52(14) . . . . ? 
C10A C5 C6 C7 -1.6(2) . . . . ? 
C10A C5 C6 N6 174.34(13) . . . . ? 
C5 C6 C7 C8 1.6(2) . . . . ? 
N6 C6 C7 C8 -173.95(14) . . . . ? 
C5 C6 C7 N7 -179.50(14) . . . . ? 
N6 C6 C7 N7 4.9(2) . . . . ? 
C6 C7 C8 C8A 0.3(2) . . . . ? 
N7 C7 C8 C8A -178.64(13) . . . . ? 
C7 C8 C8A C10A -2.1(2) . . . . ? 
C7 C8 C8A C9 171.98(14) . . . . ? 
C8 C8A C9 C9A 131.39(15) . . . . ? 
C10A C8A C9 C9A -54.15(16) . . . . ? 
C8 C8A C9 C16 -118.73(15) . . . . ? 
C10A C8A C9 C16 55.73(15) . . . . ? 
C2 C1 C9A C4A 2.4(2) . . . . ? 
C2 C1 C9A C9 -172.07(14) . . . . ? 
C4 C4A C9A C1 0.4(2) . . . . ? 
C10 C4A C9A C1 -174.55(13) . . . . ? 
C4 C4A C9A C9 175.49(13) . . . . ? 
C10 C4A C9A C9 0.54(18) . . . . ? 
C8A C9 C9A C1 -132.04(15) . . . . ? 
C16 C9 C9A C1 118.90(15) . . . . ? 
C8A C9 C9A C4A 53.09(16) . . . . ? 
C16 C9 C9A C4A -55.96(16) . . . . ? 
C4 C4A C10 C10A 131.65(15) . . . . ? 
C9A C4A C10 C10A -53.67(16) . . . . ? 
C4 C4A C10 C11 -119.21(15) . . . . ? 
C9A C4A C10 C11 55.47(16) . . . . ? 
C6 C5 C10A C8A -0.2(2) . . . . ? 
C6 C5 C10A C10 -173.12(14) . . . . ? 
C8 C8A C10A C5 2.1(2) . . . . ? 
C9 C8A C10A C5 -172.60(13) . . . . ? 
C8 C8A C10A C10 175.81(13) . . . . ? 
C9 C8A C10A C10 1.08(18) . . . . ? 
C4A C10 C10A C5 -134.08(15) . . . . ? 
C11 C10 C10A C5 115.63(15) . . . . ? 
C4A C10 C10A C8A 52.58(16) . . . . ? 
C11 C10 C10A C8A -57.70(15) . . . . ? 
C10A C10 C11 C12 -119.31(15) . . . . ? 
C4A C10 C11 C12 128.27(15) . . . . ? 
C10A C10 C11 C16 56.95(15) . . . . ? 
C4A C10 C11 C16 -55.46(16) . . . . ? 
C16 C11 C12 C13 0.7(2) . . . . ? 
C10 C11 C12 C13 176.71(14) . . . . ? 
C11 C12 C13 C14 1.1(2) . . . . ? 
C11 C12 C13 N13 -173.37(13) . . . . ? 
C12 C13 C14 C15 -2.0(2) . . . . ? 
N13 C13 C14 C15 172.32(14) . . . . ? 
C12 C13 C14 N14 173.01(14) . . . . ? 
N13 C13 C14 N14 -12.7(2) . . . . ? 
C13 C14 C15 C16 1.0(2) . . . . ? 
N14 C14 C15 C16 -174.31(13) . . . . ? 
C14 C15 C16 C11 0.9(2) . . . . ? 
C14 C15 C16 C9 -177.06(14) . . . . ? 
C12 C11 C16 C15 -1.7(2) . . . . ? 
C10 C11 C16 C15 -178.22(13) . . . . ? 
C12 C11 C16 C9 176.42(13) . . . . ? 
C10 C11 C16 C9 -0.05(18) . . . . ? 
C9A C9 C16 C15 -126.14(15) . . . . ? 
C8A C9 C16 C15 121.74(15) . . . . ? 
C9A C9 C16 C11 55.80(16) . . . . ? 
C8A C9 C16 C11 -56.33(15) . . . . ? 
C1 C2 N2 O22 72.17(19) . . . . ? 
C3 C2 N2 O22 -113.49(17) . . . . ? 
C1 C2 N2 O21 -105.63(17) . . . . ? 
C3 C2 N2 O21 68.7(2) . . . . ? 
C4 C3 N3 O32 -160.91(15) . . . . ? 
C2 C3 N3 O32 20.8(2) . . . . ? 
C4 C3 N3 O31 18.2(2) . . . . ? 
C2 C3 N3 O31 -160.10(16) . . . . ? 
C5 C6 N6 O61 90.37(18) . . . . ? 
C7 C6 N6 O61 -93.76(19) . . . . ? 
C5 C6 N6 O62 -85.46(18) . . . . ? 
C7 C6 N6 O62 90.42(19) . . . . ? 
C6 C7 N7 O71 177.59(14) . . . . ? 
C8 C7 N7 O71 -3.5(2) . . . . ? 
C6 C7 N7 O72 -2.1(2) . . . . ? 
C8 C7 N7 O72 176.79(14) . . . . ? 
C12 C13 N13 O131 143.99(14) . . . . ? 
C14 C13 N13 O131 -30.5(2) . . . . ? 
C12 C13 N13 O132 -34.4(2) . . . . ? 
C14 C13 N13 O132 151.15(14) . . . . ? 
C15 C14 N14 O142 -51.4(2) . . . . ? 
C13 C14 N14 O142 133.37(16) . . . . ? 
C15 C14 N14 O141 125.43(15) . . . . ? 
C13 C14 N14 O141 -49.8(2) . . . . ? 
C3L N1L C1L O1L 179.00(17) . . . . ? 
C2L N1L C1L O1L 1.5(3) . . . . ? 
 
_diffrn_measured_fraction_theta_max    0.998 
_diffrn_reflns_theta_full              26.25 
_diffrn_measured_fraction_theta_full   0.998 
_refine_diff_density_max    0.475 
_refine_diff_density_min   -0.265 
_refine_diff_density_rms    0.059 
